# Supplementary material for: Essential oils and their nanoemulsions as green alternatives to antibiotics in poultry nutrition: a comprehensive review
Source: PubMed Central journal article supplement — Poult Sci. 2021 Nov 8;101(2):101584. doi: 10.1016/j.psj.2021.101584 (PMC8695362; doi:10.1016/j.psj.2021.101584), 2021-11-08
Supplement: mmc1.pdf [file mmc1.pdf]

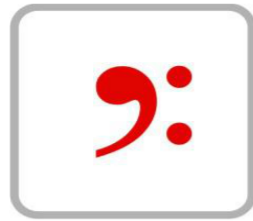

**enago**  
www.enago.com

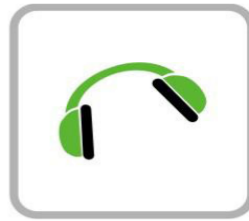

**voxtab**  
www.voxtab.com

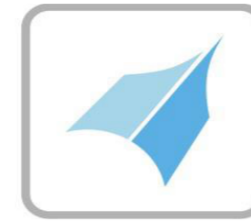

**ulatus**  
www.ulatus.com

## CERTIFICATE OF EDITING

This is to certify that the paper titled **Essential oils and its nanoemulsions as alternatives to antibiotics in poultry nutrition: A Review** commissioned to us by **Prof. Khaled El-Tarabily** has been edited for English language and spelling by Enago, an editing brand of Crimson Interactive Inc.

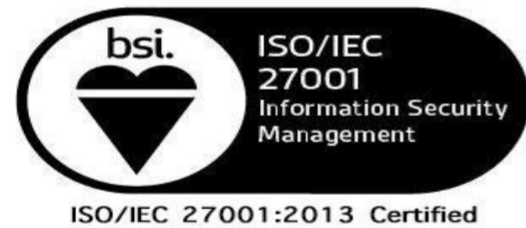

ISO/IEC 27001:2013 Certified

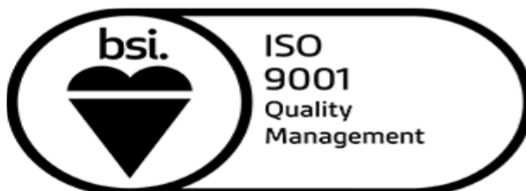

ISO 9001:2015 Certified

Issued by:  
Enago, Crimson Interactive Inc.  
1732, 1st Ave #22627  
New York, 10128  
Phone: +1-877-712-2177

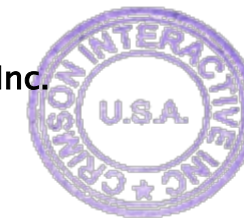

**Disclaimer:** The author is free to accept or reject our changes in the document after our editing. However, we do not bear responsibility for revisions made to the document after our edit on **February 10, 2021**.

Global      www.enago.com, www.voxtab.com, www.ulatus.com  
Japan        www.enago.jp, www.voxtab.jp, www.ulatus.jp  
Brazil        www.enago.com.br  
Germany     www.enago.de  
Turkey      www.enago.com.tr  
China        www.enago.cn  
Taiwan      www.enago.tw

**About Crimson:**  
Crimson Interactive Inc. provides English language editing, transcription, and translation services to individuals and corporate customers worldwide.
